# Supplementary material for: ULTRA-effective labeling of tandem repeats in genomic sequence
Source: PubMed Central journal article supplement (PMC11580682; doi:10.1093/bioadv/vbae149), 2024-10-09
Supplement: vbae149_supplementary_data.pdf [file vbae149_supplementary_data.pdf]

# Supplementary Material for ULTRA-Effective Labeling of Tandem Repeats in Genomic Sequence

Daniel R. Olson and Travis J. Wheeler

September 20, 2024

## 1 Coverage without minimum repeat number

These experiments were performed as described in Section 3.1 of the main paper, although without the constraint of needing a minimum number of repeat units to annotate a tandem repeat; to that end *tantan* was run with the flag `-f3` instead of `-f4`, and ULTRA was run with `--min_unit 0`.

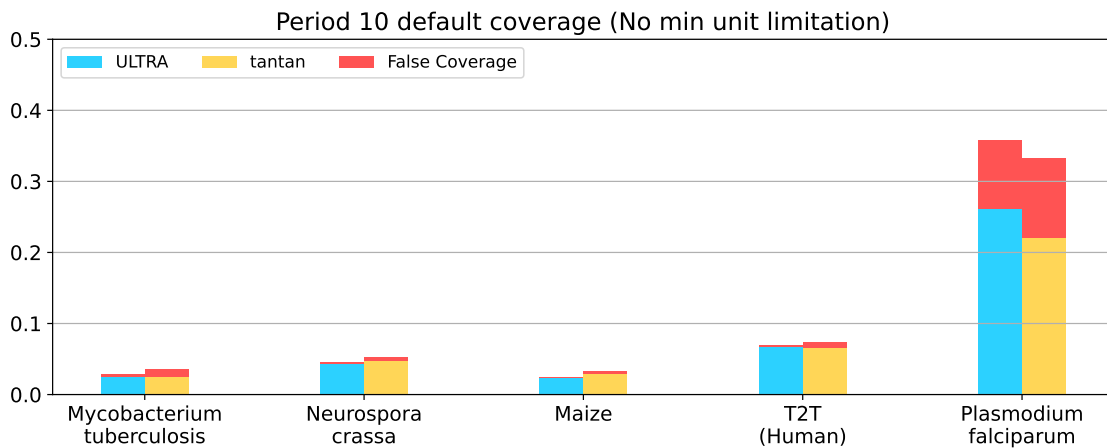

Supplementary Figure 1. Period 10 coverage with default settings (no minimum repeat unit limit)

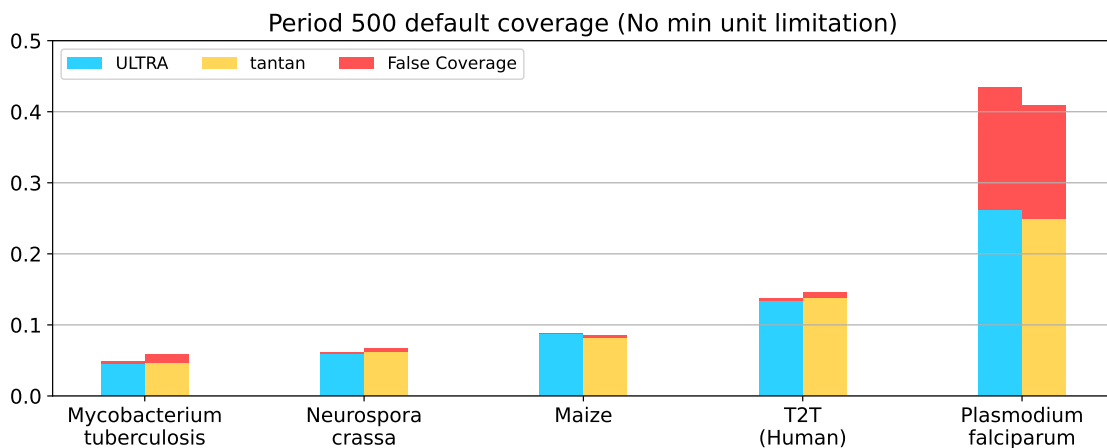

Supplementary Figure 2. Period 500 coverage with default settings (no minimum repeat unit limit)

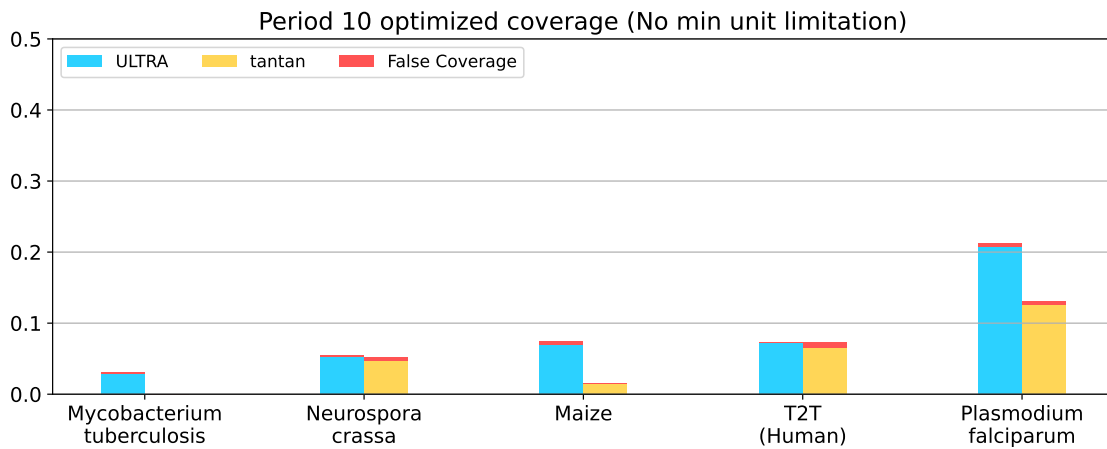

**Supplementary Figure 3.** Period 10 coverage with optimized settings (no minimum repeat unit limit)

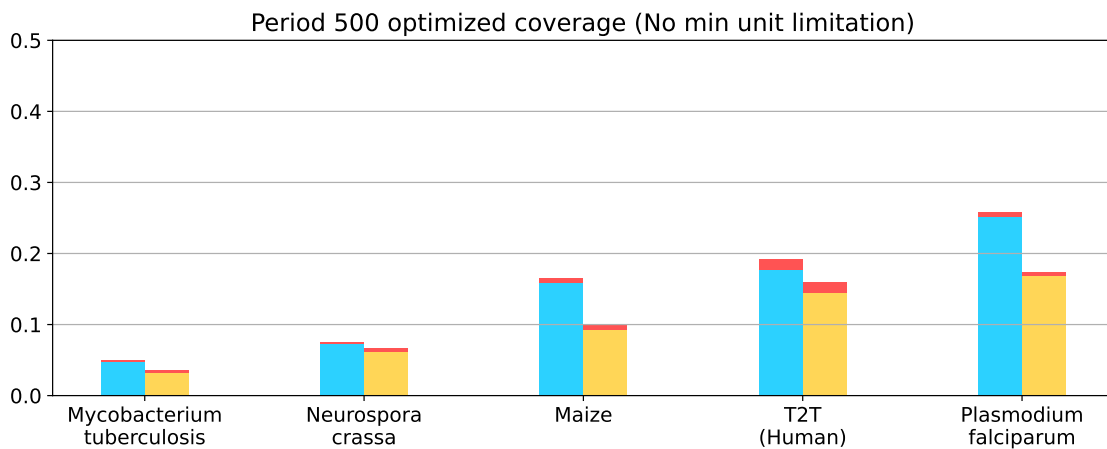

**Supplementary Figure 4.** Period 500 coverage with optimized settings (no minimum repeat unit limit)

## 2 Coverage tables and optimized parameters

The tables in this section contain numeric results for all coverage experiments. Tables corresponding to grid-optimized coverage also contain the parameters used. The placeholders [at matrix] and [gc matrix] found in some *tantan* parameters refer to a file path for an at-rich and gc-rich *tantan* scoring matrix respectively. The at-rich scoring matrix is distributed with the *tantan* source code (`tantan/test/atMask.mat`). The gc-rich scoring matrix is identical to the at-rich scoring matrix, except for the scores of AA and TT, which are swapped with the scores for CC and GG.

---

**Supplementary Table 1.** Period 10 coverage (default settings)

| <b>Genome</b>              | <b>Coverage</b> | <b>Shuffled Coverage</b> |
|----------------------------|-----------------|--------------------------|
| <b>ULTRA</b>               |                 |                          |
| Mycobacterium tuberculosis | 2.85            | 0.30                     |
| Neurospora crassa          | 4.45            | 0.14                     |
| Maize                      | 2.44            | 0.06                     |
| T2T                        | 7.00            | 0.21                     |
| Plasmodium falciparum      | 35.88           | 9.67                     |
| <b>ULTRA --tune</b>        |                 |                          |
| Mycobacterium tuberculosis | 3.87            | 0.22                     |
| Neurospora crassa          | 13.20           | 1.22                     |
| Maize                      | 13.20           | 1.38                     |
| T2T                        | 15.83           | 1.61                     |
| Plasmodium falciparum      | 43.83           | 8.21                     |
| <b>tantan</b>              |                 |                          |
| Mycobacterium tuberculosis | 0.88            | 0.29                     |
| Neurospora crassa          | 2.30            | 0.14                     |
| Maize                      | 1.08            | 0.10                     |
| T2T                        | 3.57            | 0.19                     |
| Plasmodium falciparum      | 16.22           | 2.00                     |
| <b>TRF</b>                 |                 |                          |
| Mycobacterium tuberculosis | 1.18            | 0.20                     |
| Neurospora crassa          | 2.00            | 0.12                     |
| Maize                      | 0.99            | 0.09                     |
| T2T                        | 4.41            | 0.15                     |
| Plasmodium falciparum      | 15.85           | 1.76                     |

**Supplementary Table 2.** Period 500 coverage (default settings)

| <b>Genome</b>              | <b>Coverage</b> | <b>Shuffled Coverage</b> |
|----------------------------|-----------------|--------------------------|
| <b>ULTRA</b>               |                 |                          |
| Mycobacterium tuberculosis | 4.70%           | 0.33%                    |
| Neurospora crassa          | 5.95%           | 0.18%                    |
| Maize                      | 7.61%           | 0.06%                    |
| T2T                        | 12.14%          | 0.28%                    |
| Plasmodium falciparum      | 43.34%          | 17.19%                   |
| <b>ULTRA --tune</b>        |                 |                          |
| Mycobacterium tuberculosis | 6.63%           | 0.34%                    |
| Neurospora crassa          | 19.79%          | 2.98%                    |
| Maize                      | 25.65%          | 3.35%                    |
| T2T                        | 29.40%          | 6.43%                    |
| Plasmodium falciparum      | 41.85%          | 5.89%                    |
| <b>tantan</b>              |                 |                          |
| Mycobacterium tuberculosis | 1.10%           | 0.19%                    |
| Neurospora crassa          | 2.33%           | 0.09%                    |
| Maize                      | 3.60%           | 0.07%                    |
| T2T                        | 6.50%           | 0.13%                    |
| Plasmodium falciparum      | 18.55%          | 1.64%                    |
| <b>TRF</b>                 |                 |                          |
| Mycobacterium tuberculosis | -               | -                        |
| Neurospora crassa          | 3.00%           | 0.18%                    |
| Maize                      | 8.20%           | 0.45%                    |
| T2T                        | 12.89%          | 0.82%                    |
| Plasmodium falciparum      | -               | -                        |

**Supplementary Table 3.** Period 10 coverage (optimized settings)

| Genome                     | Coverage | Shuffled Coverage | Arguments                                         |
|----------------------------|----------|-------------------|---------------------------------------------------|
| <b>ULTRA</b>               |          |                   |                                                   |
| Mycobacterium tuberculosis | 3.07%    | 0.18%             | -p 10 -m 0.6 --at 0.5                             |
| Neurospora crassa          | 5.51%    | 0.17%             | -p 10 -m 0.6 --at 0.6                             |
| Maize                      | 7.48%    | 0.45%             | -p 10 -m 0.6 --at 0.4                             |
| T2T                        | 7.37%    | 0.14%             | -p 10 -m 0.6 --at 0.5                             |
| Plasmodium falciparum      | 21.25%   | 0.49%             | -p 10 -m 0.7 --at 0.6                             |
| <b>tantan</b>              |          |                   |                                                   |
| Mycobacterium tuberculosis | -        | -                 | -                                                 |
| Neurospora crassa          | 2.60%    | 0.20%             | -w 10 -f 3 -r 0.005 -e 0.05                       |
| Maize                      | 1.08%    | 0.11%             | -w 10 -f 3 -r 0.005 -e 0.05 -s 0.85               |
| T2T                        | 3.82%    | 0.27%             | -w 10 -f 3 -r 0.01 -e 0.05                        |
| Plasmodium falciparum      | 12.55%   | 0.08%             | -w 10 -f 3 -r 0.01 -e 0.05 -s 0.85 -m [at matrix] |
| <b>TRF</b>                 |          |                   |                                                   |
| Mycobacterium tuberculosis | -        | -                 | -                                                 |
| Neurospora crassa          | 3.45%    | 0.30%             | 2 5 5 80 10 30 10 -l 12 -h -ngs                   |
| Maize                      | 0.99%    | 0.09%             | 2 7 7 80 10 30 10 -l 12 -h -ngs                   |
| T2T                        | 5.09%    | 0.40%             | 2 5 5 80 10 30 10 -l 12 -h -ngs                   |
| Plasmodium falciparum      | -        | -                 | -                                                 |

**Supplementary Table 4.** Period 500 coverage (optimized settings)

| Genome                     | Coverage | Shuffled Coverage | Arguments                                           |
|----------------------------|----------|-------------------|-----------------------------------------------------|
| <b>ULTRA</b>               |          |                   |                                                     |
| Mycobacterium tuberculosis | 4.92%    | 0.20%             | -p 500 -m 0.6 --at 0.5                              |
| Neurospora crassa          | 7.47%    | 0.22%             | -p 500 -m 0.6 --at 0.6                              |
| Maize                      | 15.95%   | 0.65%             | -p 500 -m 0.6 --at 0.4                              |
| T2T                        | 15.37%   | 1.48%             | -p 500 -m 0.7 --at 0.7                              |
| Plasmodium falciparum      | 41.85%   | 5.89%             | -p 500 -m 0.7 --at 0.6                              |
| <b>tantan</b>              |          |                   |                                                     |
| Mycobacterium tuberculosis | 1.60%    | 0.12%             | -w 500 -f 3 -r 0.005 -e 0.05 -m [gc matrix]         |
| Neurospora crassa          | 2.88%    | 0.20%             | -w 500 -f 3 -r 0.01 -e 0.05 -s 0.85                 |
| Maize                      | 3.97%    | 0.15%             | -w 500 -f 3 -r 0.01 -e 0.05                         |
| T2T                        | 11.35%   | 0.82%             | -w 500 -f 3 -r 0.005 -e 0.05 -s 0.85 -m [at matrix] |
| Plasmodium falciparum      | 18.55%   | 1.64%             | -w 500 -f 3 -r 0.005 -e 0.05                        |
| <b>TRF</b>                 |          |                   |                                                     |
| Mycobacterium tuberculosis | -        | -                 | -                                                   |
| Neurospora crassa          | 3.00%    | 0.18%             | 2 7 7 80 10 30 500 -l 12 -h -ngs                    |
| Maize                      | 8.20%    | 0.45%             | 2 5 5 80 10 30 500 -l 12 -h -ngs                    |
| T2T                        | 12.89%   | 0.82%             | 2 5 5 80 10 30 500 -l 12 -h -ngs                    |
| Plasmodium falciparum      | -        | -                 | -                                                   |

**Supplementary Table 5.** Period 10 coverage (default settings, no minimum unit)

| Genome                     | Coverage | Shuffled Coverage | Arguments          |
|----------------------------|----------|-------------------|--------------------|
| <b>ULTRA</b>               |          |                   |                    |
| Mycobacterium tuberculosis | 2.85%    | 0.30%             | -p 10 --min_unit 0 |
| Neurospora crassa          | 4.45%    | 0.14%             | -p 10 --min_unit 0 |
| Maize                      | 2.44%    | 0.06%             | -p 10 --min_unit 0 |
| T2T                        | 7.00%    | 0.21%             | -p 10 --min_unit 0 |
| Plasmodium falciparum      | 35.88%   | 9.67%             | -p 10 --min_unit 0 |
| <b>tantan</b>              |          |                   |                    |
| Mycobacterium tuberculosis | 3.56%    | 1.08%             | -w 10 -f 3         |
| Neurospora crassa          | 5.24%    | 0.51%             | -w 10 -f 3         |
| Maize                      | 3.22%    | 0.33%             | -w 10 -f 3         |
| T2T                        | 7.32%    | 0.73%             | -w 10 -f 3         |
| Plasmodium falciparum      | 33.21%   | 11.12%            | -w 10 -f 3         |

**Supplementary Table 6.** Period 500 coverage (default settings, no minimum unit)

| Genome                     | Coverage | Shuffled Coverage | Arguments           |
|----------------------------|----------|-------------------|---------------------|
| <b>ULTRA</b>               |          |                   |                     |
| Mycobacterium tuberculosis | 4.87%    | 0.33%             | -p 500 --min_unit 0 |
| Neurospora crassa          | 6.15%    | 0.18%             | -p 500 --min_unit 0 |
| Maize                      | 8.82%    | 0.06%             | -p 500 --min_unit 0 |
| T2T                        | 13.73%   | 0.28%             | -p 500 --min_unit 0 |
| Plasmodium falciparum      | 43.44%   | 17.23%            | -p 500 --min_unit 0 |
| <b>tantan</b>              |          |                   |                     |
| Mycobacterium tuberculosis | 5.86%    | 1.20%             | -w 500 -f 3         |
| Neurospora crassa          | 6.74%    | 0.56%             | -w 500 -f 3         |
| Maize                      | 8.51%    | 0.35%             | -w 500 -f 3         |
| T2T                        | 14.55%   | 0.82%             | -w 500 -f 3         |
| Plasmodium falciparum      | 40.82%   | 15.92%            | -w 500 -f 3         |

**Supplementary Table 7.** Period 10 coverage (optimized settings, no minimum unit)

| Genome                     | Coverage | Shuffled Coverage | Arguments                                 |
|----------------------------|----------|-------------------|-------------------------------------------|
| <b>ULTRA</b>               |          |                   |                                           |
| Mycobacterium tuberculosis | 3.07%    | 0.18%             | --min_unit 0 -p 10 -m 0.6 --at 0.5        |
| Neurospora crassa          | 5.51%    | 0.17%             | --min_unit 0 -p 10 -m 0.6 --at 0.6        |
| Maize                      | 7.48%    | 0.45%             | --min_unit 0 -p 10 -m 0.6 --at 0.5        |
| T2T                        | 7.37%    | 0.14%             | --min_unit 0 -p 10 -m 0.6 --at 0.5        |
| Plasmodium falciparum      | 21.25%   | 0.49%             | --min_unit 0 -p 10 -m 0.7 --at 0.5        |
| <b>tantan</b>              |          |                   |                                           |
| Mycobacterium tuberculosis | -        | -                 | -                                         |
| Neurospora crassa          | 5.24%    | 0.51%             | -w 10 -f 3 -r 0.005 -e 0.05               |
| Maize                      | 1.50%    | 0.08%             | -w 10 -f 3 -r 0.01 -e 0.05 -s -0.85       |
| T2T                        | 7.32%    | 0.73%             | -w 10 -f 3 -r 0.005 -e 0.05               |
| Plasmodium falciparum      | 13.09%   | 0.44%             | -w 10 -f 3 -r 0.01 -e 0.05 -m [at matrix] |

**Supplementary Table 8.** Period 500 coverage (optimized settings, no minimum unit)

| Genome                     | Coverage | Shuffled Coverage | Arguments                                  |
|----------------------------|----------|-------------------|--------------------------------------------|
| <b>ULTRA</b>               |          |                   |                                            |
| Mycobacterium tuberculosis | 4.98%    | 0.20%             | --min_unit 0 -p 500 -m 0.6 --at 0.5        |
| Neurospora crassa          | 7.58%    | 0.22%             | --min_unit 0 -p 500 -m 0.6 --at 0.6        |
| Maize                      | 16.53%   | 0.65%             | --min_unit 0 -p 500 -m 0.6 --at 0.4        |
| T2T                        | 19.21%   | 1.50%             | --min_unit 0 -p 500 -m 0.7 --at 0.7        |
| Plasmodium falciparum      | 25.88%   | 0.66%             | --min_unit 0 -p 500 -m 0.7 --at 0.6        |
| <b>tantan</b>              |          |                   |                                            |
| Mycobacterium tuberculosis | 3.54%    | 0.35%             | -w 500 -f 3 -r 0.01 -e 0.05 -s -0.85       |
| Neurospora crassa          | 6.74%    | 0.56%             | -w 500 -f 3 -r 0.005 -e 0.05               |
| Maize                      | 9.88%    | 0.69%             | -w 500 -f 3 -r 0.01 -e 0.05                |
| T2T                        | 15.91%   | 1.44%             | -w 500 -f 3 -r 0.01 -e 0.05                |
| Plasmodium falciparum      | 17.31%   | 0.47%             | -w 500 -f 3 -r 0.01 -e 0.05 -m [at matrix] |
